# Supplementary material for: In situ growth of monodisperse Fe3O4 nanoparticles on graphene as flexible paper for supercapacitor
Source: Royal Society of Chemistry journal article supplement (doi:10.1039/c4ta01442a), 2014-01-01
Supplement: c4ta01442a1.pdf [file c4ta01442a1.pdf]

Supplementary Material (ESI) for Journal of Material Chemistry A

This journal is (c) The Royal Society of Chemistry 2014

**In-situ growth of monodisperse Fe<sub>3</sub>O<sub>4</sub> nanoparticles on  
graphene as flexible paper for supercapacitor**

*Miaomiao Liu, Jing Sun\**

*The State Key Lab of High Performance Ceramics and Superfine Microstructure,  
Shanghai Institute of Ceramics, Chinese Academy of Sciences, 1295 Ding Xi Road,*

*Shanghai 200050, China*

*E-mail address: [jingsun@mail.sic.ac.cn](mailto:jingsun@mail.sic.ac.cn) (J. Sun)*

*Tel: +86-12-52414301. Fax: +86-21-52413122*

## Electronic Supplementary Information (ESI)

### Supplementary Graphics

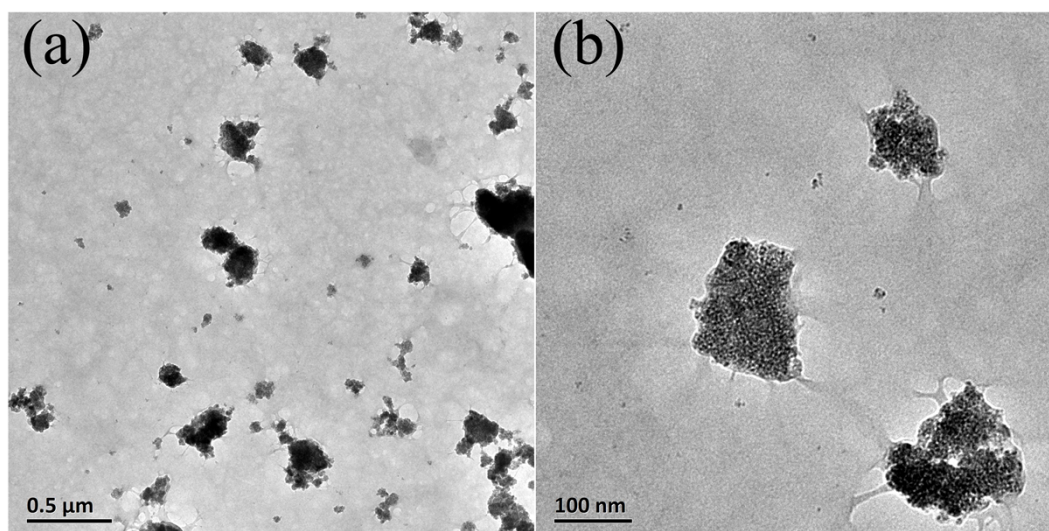

Fig. S1 TEM images of  $\text{Fe}_2\text{O}_3$ .

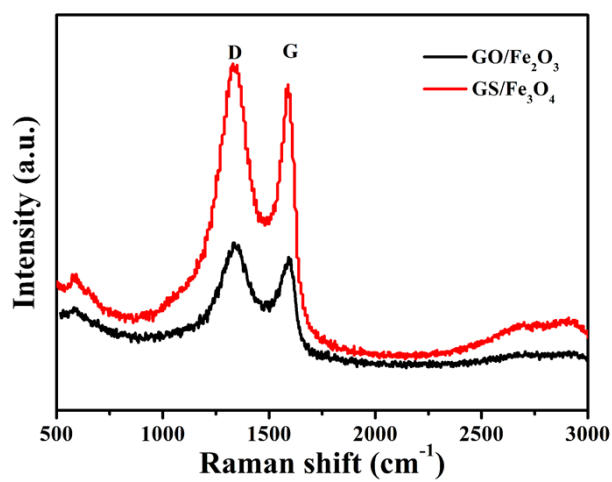

Fig. S2 Raman spectra of  $\text{GO}/\text{Fe}_2\text{O}_3$  and  $\text{GS}/\text{Fe}_3\text{O}_4$  composites.

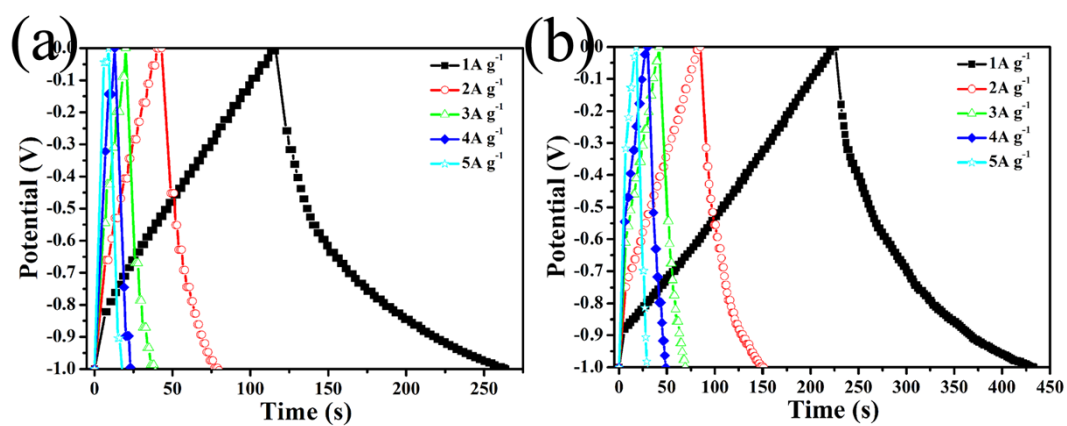

**Fig. S3** Galvanostatic charge/discharge curves of (a) Trad. Fe<sub>3</sub>O<sub>4</sub> (b) Trad. GS/Fe<sub>3</sub>O<sub>4</sub> electrodes at different current densities.

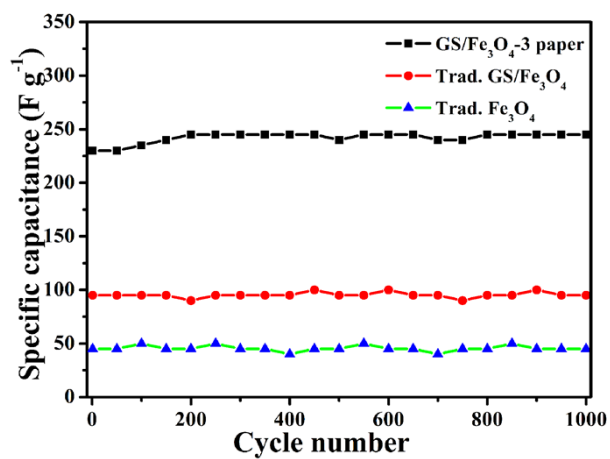

**Fig. S4** Cyclic performance of Trad. Fe<sub>3</sub>O<sub>4</sub>, Trad. GS/Fe<sub>3</sub>O<sub>4</sub> and GS/Fe<sub>3</sub>O<sub>4</sub>-3 paper at 5 A g<sup>-1</sup>.
